# Supplementary material
Source: PubMed Central journal article supplement (PMC6331005)
Supplement: NIHMS1508064-supplement-Supp_tables.pdf [file NIHMS1508064-supplement-Supp_tables.pdf]

In the format provided by the authors and unedited.

# Efferocytosis induces a novel SLC program to promote glucose uptake and lactate release

Sho Morioka<sup>1,2,11</sup>, Justin S. A. Perry<sup>1,2,11</sup>, Michael H. Raymond<sup>1,3</sup>, Christopher B. Medina<sup>1,2</sup>, Yunlu Zhu<sup>4</sup>, Liyang Zhao<sup>5</sup>, Vlad Serbulea<sup>6</sup>, Suna Onengut-Gumuscu<sup>7</sup>, Norbert Leitinger<sup>6</sup>, Sarah Kucenas<sup>4</sup>, Jeffrey C. Rathmell<sup>8</sup>, Liza Makowski<sup>5,9</sup> & Kodi S. Ravichandran<sup>1,2,10\*</sup>

---

<sup>1</sup>The Center for Cell Clearance, University of Virginia, Charlottesville, VA, USA. <sup>2</sup>Department of Microbiology, Immunology and Cancer Biology, University of Virginia, Charlottesville, VA, USA. <sup>3</sup>Neuroscience Graduate Program, University of Virginia, Charlottesville, VA, USA. <sup>4</sup>Department of Biology, University of Virginia, Charlottesville, VA, USA. <sup>5</sup>Department of Nutrition, University of North Carolina, Chapel Hill, NC, USA. <sup>6</sup>Department of Pharmacology, University of Virginia, Charlottesville, VA, USA. <sup>7</sup>Center for Public Health Genomics, University of Virginia, Charlottesville, VA, USA. <sup>8</sup>Department of Pathology, Microbiology and Immunology, Vanderbilt University Medical Center, Nashville, TN, USA. <sup>9</sup>Department of Medicine, University of Tennessee Health Science Center, Memphis, TN, USA. <sup>10</sup>Inflammation Research Centre, VIB, and Department of Biomedical Molecular Biology, Ghent, Belgium. <sup>11</sup>These authors contributed equally: Sho Morioka, Justin S. A. Perry. \*e-mail: ravi@virginia.edu



## Supplementary Table 1. Gene List Associated with Figure 1a (Page 2)

| <u>Glycolysis-associated genes</u> |                | <u>Anti-inflammatory-associated genes</u> |                | <u>Anti-apoptotic-associated genes</u> |                | <u>Calcium signaling-associated genes</u> |                | <u>Actin rearrangement/Cell motility genes</u> |                | <u>ER Stress/UPR-associated genes</u> |                |
|------------------------------------|----------------|-------------------------------------------|----------------|----------------------------------------|----------------|-------------------------------------------|----------------|------------------------------------------------|----------------|---------------------------------------|----------------|
| Up-regulated                       | Down-regulated | Up-regulated                              | Down-regulated | Up-regulated                           | Down-regulated | Up-regulated                              | Down-regulated | Up-regulated                                   | Down-regulated | Up-regulated                          | Down-regulated |
| Ranbp2                             |                | Fos                                       |                | Hspa8                                  |                | Itpr3                                     | Calhm3         | Gas2l3                                         | Swap70         | Eif5                                  | Tri3           |
| Txnip                              |                | Fosl1                                     |                | Gtse1                                  |                | Cask                                      | Cpne2          | Cdc42ep2                                       | Col16a1        | eIF5L                                 | Herpud1        |
| Pgm1                               |                | Fosl2                                     |                | Ier3                                   |                | Nfatc3                                    |                | Cdc42ep1                                       | Itga3          | Clcc1                                 | Dnajb9         |
| Gys1                               |                | Dusp6                                     |                | Usp27x                                 |                | Ppp2r2a                                   |                | Cdc42se1                                       | Ssx2ip         | Ero1l                                 | Vapb           |
| Pea15                              |                | Tnfaip3                                   |                | Sept4                                  |                | Asph                                      |                | Rai14                                          | Dock4          | Ppwd1                                 | Atf3           |
| Myo1c                              |                | il1rl1                                    |                | Ywhaz                                  |                | Cacna1c                                   |                | Pcdh7                                          | Pkp2           | Tmem129                               | Dab2           |
| Nucks1                             |                | Il25                                      |                | Kiaa0020                               |                | Atp2b1                                    |                | Mical2                                         | Fscn1          | Heatr3                                | Ppp1r15a       |
| Pfkfb3                             |                | Il33                                      |                | Ltbp1                                  |                | Orai1                                     |                | Ssh1                                           | Sh3yl1         | Faf2                                  | Grina          |
| Pik3r3                             |                | Ifngr1                                    |                | Api5                                   |                | Ezr                                       |                | Actr2                                          | Fmnl3          | Sec61a2                               |                |
| Trmt10a                            |                | Ifngr2                                    |                | Fam129b                                |                | Cd44                                      |                | Nrg2                                           |                | C3orf58                               |                |
| Ppcdc                              |                | Thbs1                                     |                | WISP1                                  |                | Arhgdia                                   |                | Fmnl2                                          |                | Tbl2                                  |                |
| Hk1                                |                | Metrnl                                    |                | Map4k4                                 |                |                                           |                | Elmo3                                          |                | EIF2B4                                |                |
| Aldoa                              |                | Zfyve9                                    |                | C3orf38                                |                |                                           |                | Pak2                                           |                | EIF2B5                                |                |
| Eno1                               |                | Mybbp1a                                   |                | Plrg1                                  |                |                                           |                | Syne3                                          |                | ERN1                                  |                |
| Hk2                                |                | Sema3e                                    |                | Ripk1                                  |                |                                           |                | Tubb4b                                         |                | Atf6b                                 |                |
| Pdk1                               |                | Tnfrsf21                                  |                | Celf1                                  |                |                                           |                | TUBA1A                                         |                | ATF4                                  |                |
| Pdk4                               |                | Thbd                                      |                | Srm                                    |                |                                           |                | Miip                                           |                | Ddit3                                 |                |
| Pfkl                               |                | Vasn                                      |                | Ovca2                                  |                |                                           |                | Incenp                                         |                |                                       |                |
| Pgam1                              |                | Sdc1                                      |                | Ptgr2                                  |                |                                           |                | Lama3                                          |                |                                       |                |
| Hif1a                              |                | Sap30                                     |                | Rtn4                                   |                |                                           |                | Camsap1                                        |                |                                       |                |
| Pgk1                               |                | Nkrf                                      |                | C1qbp                                  |                |                                           |                | Fam83d                                         |                |                                       |                |
| Gpi                                |                | Tgif1                                     |                | Ddx3x                                  |                |                                           |                | Ckap2                                          |                |                                       |                |
| Got1                               |                | Cnpy4                                     |                | Mcl1                                   |                |                                           |                | Gja1                                           |                |                                       |                |
| Got2                               |                | Hmox1                                     |                | Bcl2l1                                 |                |                                           |                | Enah                                           |                |                                       |                |
| Sp1                                |                | Klf9                                      |                | Spata13                                |                |                                           |                | Tm4sf1                                         |                |                                       |                |
| Slc2a1                             |                |                                           |                | Coro1c                                 |                |                                           |                | Diexf                                          |                |                                       |                |
|                                    |                |                                           |                | Gadd45a                                |                |                                           |                | Arhgap19                                       |                |                                       |                |
|                                    |                |                                           |                |                                        |                |                                           |                | Actg1                                          |                |                                       |                |
|                                    |                |                                           |                |                                        |                |                                           |                | Vim                                            |                |                                       |                |
|                                    |                |                                           |                |                                        |                |                                           |                | Kif20b                                         |                |                                       |                |
|                                    |                |                                           |                |                                        |                |                                           |                | Kif2c                                          |                |                                       |                |
|                                    |                |                                           |                |                                        |                |                                           |                | Tnc                                            |                |                                       |                |
|                                    |                |                                           |                |                                        |                |                                           |                | Ralgds                                         |                |                                       |                |
|                                    |                |                                           |                |                                        |                |                                           |                | Tjap1                                          |                |                                       |                |
|                                    |                |                                           |                |                                        |                |                                           |                | Srpx2                                          |                |                                       |                |
|                                    |                |                                           |                |                                        |                |                                           |                | Palld                                          |                |                                       |                |
|                                    |                |                                           |                |                                        |                |                                           |                | Zmpste24                                       |                |                                       |                |
|                                    |                |                                           |                |                                        |                |                                           |                | Ankrd28                                        |                |                                       |                |
|                                    |                |                                           |                |                                        |                |                                           |                | Spire1                                         |                |                                       |                |
|                                    |                |                                           |                |                                        |                |                                           |                | Ezr                                            |                |                                       |                |
|                                    |                |                                           |                |                                        |                |                                           |                | Cd44                                           |                |                                       |                |
|                                    |                |                                           |                |                                        |                |                                           |                | Arhgdia                                        |                |                                       |                |
|                                    |                |                                           |                |                                        |                |                                           |                | Kifc3                                          |                |                                       |                |
|                                    |                |                                           |                |                                        |                |                                           |                | Anln                                           |                |                                       |                |
|                                    |                |                                           |                |                                        |                |                                           |                | Tiam2                                          |                |                                       |                |

## Supplementary Table 2. Categorization and disease associations of SLCs modified during efferocytosis

| Gene     | Alt ID       | Primary Categorization            | Additional Categorizations                                                         | Monogenic Disease?                                                                                                                                                                                                        | SNP/Phenotype Association?                                                                 | SLC Family                                                         |
|----------|--------------|-----------------------------------|------------------------------------------------------------------------------------|---------------------------------------------------------------------------------------------------------------------------------------------------------------------------------------------------------------------------|--------------------------------------------------------------------------------------------|--------------------------------------------------------------------|
| Slc2a1   | Glut1        | Carbohydrate Metabolism           | Cell Volume Regulation                                                             | GLUT1 Deficiency Syndrome, Intellectual Disability and Epilepsy                                                                                                                                                           |                                                                                            | Glucose transporter                                                |
| Slc4a7   | Nbc2         | intracellular pH                  |                                                                                    |                                                                                                                                                                                                                           | Breast Cancer, Systolic/Diastolic Blood Pressure                                           | Sodium Bicarbonate Cotransporter                                   |
| Slc5a6   | SMVT         | Vitamin Transport                 | Carbohydrate Metabolism                                                            | Child presenting with: microcephaly, cerebral palsy, developmental delay, variable immunodeficiency, severe gastro-esophageal reflux, osteoporosis, & pathologic bone fractures                                           |                                                                                            | Sodium/Multivitamin And Iodide Cotransporter                       |
| Slc6a6   | TAUT         | Cell Volume Regulation            | Membrane stability                                                                 |                                                                                                                                                                                                                           | Retinal Degeneration                                                                       | Taurine Transporter                                                |
| Slc7a7   | LPI          | Amino Acid Transport & Catabolism | Urea Cycle; Cell Migration; NO Synthesis                                           | Lysinuric Protein Intolerance<br>Patient presenting with: orthostatic intolerance, respiratory weakness, multiple endocrine abnormalities, pancreatic insufficiency, and multiorgan failure involving the gut and bladder |                                                                                            | Amino Acid Transporter Light Chain, Y+L system                     |
| Slc12a2  | NKCC1        | Cell Volume Regulation            | Membrane stability                                                                 |                                                                                                                                                                                                                           | Schizophrenia, Salivation Deficiency, Deafness, Male infertility (spermatogenesis)         | Electrically Silent Transporter System                             |
| Slc14a1  | JK, UT1      | Cell Volume Regulation            | Nitrogen Secretion, Urea Cycle                                                     | Chronic Multifocal Osteomyelitis                                                                                                                                                                                          | Human Urothelial Cancer                                                                    | Urea transporter                                                   |
| Slc16a1  | MCT1         | intracellular pH                  | Excretion of monocarboxylates                                                      | Recurrent Ketoacidosis                                                                                                                                                                                                    | Hyperinsulinism                                                                            | Monocarboxylate Transporter                                        |
| Slc19a1  | IFC-1        | Vitamin Transport                 | One carbon metabolism, nucleoside synthesis                                        |                                                                                                                                                                                                                           | Pregnancy Loss, Myelomeningocele                                                           | Folate Transporter                                                 |
| Slc20a1  | GLVR1        | Carbohydrate Metabolism           |                                                                                    |                                                                                                                                                                                                                           | Combined pituitary hormone deficiency                                                      | Phosphate Transporter                                              |
| Slc26a6  | Pendrin L1   | intracellular pH                  |                                                                                    |                                                                                                                                                                                                                           | Calcium Oxalate Urolithiasis; Irritable Bowel Disease, Crohn's Disease, Ulcerative Colitis | Anion Exchanger                                                    |
| Slc29a1  | ENT1         | Nucleoside salvage                | Nucleotide synthesis, carbohydrate metabolism, one carbon metabolism               | Augstine Blood Group                                                                                                                                                                                                      | Mineralization                                                                             | Equilibrative Nucleoside Transporter                               |
| Slc29a2  | ENT2/HNP36   | Nucleoside salvage                | Nucleotide synthesis, carbohydrate metabolism, one carbon metabolism               |                                                                                                                                                                                                                           |                                                                                            | Equilibrative Nucleoside Transporter                               |
| Slc35a4  | MGC2541      | Glycosylation                     |                                                                                    |                                                                                                                                                                                                                           |                                                                                            | Nucleotide-Sugar Transporter Family                                |
| Slc35e1  | FLJ14251     | Glycosylation                     |                                                                                    |                                                                                                                                                                                                                           |                                                                                            | Nucleotide-Sugar Transporter Family                                |
| Slc39a10 | ZIP-10       | Membrane stability                | Protein synthesis and stability, Enzyme catalyst, Cell death regulation            |                                                                                                                                                                                                                           |                                                                                            | Zinc Transporter                                                   |
| Slc41a2  | LOC100771510 | Enzyme catalysis                  | Carbohydrate metabolism, nucleotide synthesis, cell volume regulation, FAO, OXPHOS |                                                                                                                                                                                                                           |                                                                                            | Magnesium Transporter                                              |
| Slc45a4  | N/A          | Unknown                           |                                                                                    |                                                                                                                                                                                                                           | Multiple Blood Cell Variants                                                               | Putative Sugar Transporter                                         |
| Slc46a1  | HCP1         | Vitamin Transport                 | One carbon metabolism, nucleoside synthesis                                        | Hereditary Folate Malabsorption                                                                                                                                                                                           |                                                                                            | Folate Transporter                                                 |
| Gene     | Alt ID       | Primary Categorization            | Additional Categorizations                                                         | Monogenic Disease?                                                                                                                                                                                                        | SNP/Phenotype Association?                                                                 | SLC Family                                                         |
| Slc1a4   | ASCT-1       | Amino Acid Transport & Catabolism | Neutral amino acid transport                                                       | Severe Intellectual Disability & Microcephaly                                                                                                                                                                             |                                                                                            | Glutamate/Neutral Amino Acid Transporter                           |
| Slc6a4   | SHTT         | Serotonin                         |                                                                                    |                                                                                                                                                                                                                           |                                                                                            | Neurotransmitter Transporter                                       |
| Slc15a3  | OCTP         | Amino Acid Transport & Catabolism | Endosome/lysosome function                                                         |                                                                                                                                                                                                                           |                                                                                            | Oligopeptide Transporter                                           |
| Slc17a5  | sialin       | Amino Acid Transport & Catabolism | Neutral amino acid transport, endosome/lysosome function                           | Sialic Acid Storage Diseases. Salla Disease                                                                                                                                                                               |                                                                                            | Vesicular glutamate transporter family                             |
| Slc25a42 | N/A          | OXPHOS                            |                                                                                    |                                                                                                                                                                                                                           | Mitochondrial Myopathy/Encephalomyelopathy                                                 | Mitochondrial carrier                                              |
| Slc25a45 | N/A          | OXPHOS                            |                                                                                    |                                                                                                                                                                                                                           |                                                                                            | Mitochondrial carrier                                              |
| Slc29a3  | ENT3         | Mitochondrial respiration         | Endosome/lysosome function                                                         | H syndrome, Pigmented Hypertrichotic Dermatitis with Insulin-dependent Diabetes, Dysosteosclerosis                                                                                                                        |                                                                                            | Equilibrative Nucleoside Transporter                               |
| Slc31a2  | COPT2        | Enzymatic catalysis               | OXPHOS, pro-inflammatory mediators                                                 |                                                                                                                                                                                                                           |                                                                                            | Copper Transporter                                                 |
| Slc33a1  | ACATN        | OXPHOS                            | FAO, ER stress, autophagy, glycolysis                                              | Hupke-Brendel Syndrome, Autosomal Dominant Spastic Paraplegias, Autosomal-Recessive Syndrome of Congenital Cataracts, Hearing Loss, and Severe Developmental Delay                                                        | Autism Spectrum Disorder                                                                   | Acetyl-CoA Transporter                                             |
| Slc35d2  | UGTrel8      | Glycosylation                     |                                                                                    |                                                                                                                                                                                                                           |                                                                                            | UDP-GlcNAc/UDP-Glucose Transporter                                 |
| Slc35f5  | NSSATP3      | Glycosylation                     |                                                                                    |                                                                                                                                                                                                                           |                                                                                            | Nucleoside-Sugar Transporter                                       |
| Slc36a1  | PAT1         | Amino Acid Transport & Catabolism | Neutral amino acid transport                                                       |                                                                                                                                                                                                                           |                                                                                            | Amino Acid Transporter                                             |
| Slc41a3  | n/A          | Enzyme catalysis                  | FAO, OXPHOS, membrane integrity                                                    |                                                                                                                                                                                                                           | Hypomagnesemia, Hydronephrosis                                                             | Magnesium transporter                                              |
| Slc45a1  | DNB5         | Oxidative stress                  | FAO, OXPHOS, glycolysis                                                            | Intellectual Disability and Epilepsy                                                                                                                                                                                      |                                                                                            | Glycoside-Pentoside-Hexuronide Cation Symporter Transporter Family |

### Supplementary Table 3. List of Hamster-Specific and Mouse-Specific Taqman Primers

|                | <b>Gene Name</b> | <b>TaqMan Primer</b> | <b>Gene Name</b> | <b>TaqMan Primer</b> |
|----------------|------------------|----------------------|------------------|----------------------|
| <b>Hamster</b> | Slc2a1           | Cg04422507_g1        | Slc25a42         | Cg04611876_m1        |
|                | Slc41a2          | Cg04609763_m1        | Slc25a45         | Cg0522193_m1         |
|                | Slc20a1          | Cg04424040_g1        | Slc29a3          | Cg04611892_m1        |
|                | Slc4a7           | Cg04579143_m1        | Slc31a2          | Cg04601434_m1        |
|                | Slc16a1          | Cg04439014_m1        | Slc33a1          | Cg04588736_m1        |
|                | Slc26a6          | Cg04435061_g1        | Slc41a3          | Cg04624425_m1        |
|                | Slc29a1          | Cg04611942_g1        | Slc45a1          | Cg04460700_m1        |
|                | Slc29a2          | Cg04599787_m1        | Slc1a4           | Cg04422018_m1        |
|                | Slc12a2          | Cg04623926_m1        | Slc15a3          | Cg04548708_m1        |
|                | Slc14a1          | Cg04467092_m1        | Slc17a5          | Cg04626606_m1        |
|                | Slc6a6           | Cg04435061_g1        | Slc35d2          | Cg04618339_m1        |
|                | Slc39a10         | Cg04581977_m1        | Slc35f5          | Cg04635914_m1        |
|                | hGAPDH           | Cg04424038_gH        | Sgk1             | Cg04627078_g1        |
|                | <b>Mouse</b>     | Slc2a1               | Mm00441480_m1    | Mgl1                 |
| Slc20a1        |                  | Mm00489378_m1        | Mgl2             | Mm00460844_m1        |
| Slc14a1        |                  | Mm00472199_m1        | Tgfb             | Mm01178820_m1        |
| Slc12a2        |                  | Mm01265951_m1        | Vegf             | Mm01281449_m1        |
| Slc29a1        |                  | Mm01270577_m1        | IL10             | Mm01288386_m1        |
| Slc29a2        |                  | Mm00432817_m1        | TNF              | Mm00443258_m1        |
| Slc4a7         |                  | Mm01310972_m1        | IL6              | Mm00446190_m1        |
| Slc16a1        |                  | Mm01310972_m1        |                  |                      |
| Slc29a3        |                  | Mm00469915_m1        |                  |                      |
| mGAPDH         |                  | Mm99999915_g1        |                  |                      |

## Supplementary Table 4. List of Statistical Tests and Sample Sizes Used From Each Figure (Page 1)

### Main Figures

| Figure ID | Statistical test used   | Post-hoc test    | Direction | p value range  | Measure of Centre | Error | Technical replicates | Biological replicates | Experimental replicates |
|-----------|-------------------------|------------------|-----------|----------------|-------------------|-------|----------------------|-----------------------|-------------------------|
| Figure 1a | Differential Expression | Indep. Filtering | Two-sided | adjusted p <.1 | N/A               | N/A   | N/A                  | n=1 per group         | n=4                     |
| Figure 2a | Mann-Whitney U Test     | N/A              | Two-sided | <.001 to <.05  | Mean              | SEM   | N/A                  | AC, n=3; FC, n=4      | n=2                     |
| Figure 2c | Mann-Whitney U Test     | N/A              | Two-sided | <.001 to <.01  | Mean              | SEM   | N/A                  | n=6/group             | n=2                     |
| Figure 3a | Two-way ANOVA           | Sidek            | N/A       | <.001          | Mean              | SD    | n=2                  | N/A                   | n=3                     |
| Figure 3b | One-way ANOVA           | Tukey            | N/A       | <.001          | Mean              | SD    | n=2                  | N/A                   | n=3                     |
| Figure 3c | Mann-Whitney U Test     | N/A              | Two-sided | <.001          | Mean              | SEM   | n=2                  | n=2/experiment        | n=3                     |
| Figure 3d | Mann-Whitney U Test     | N/A              | Two-sided | <.001          | Mean              | SEM   | N/A                  | n=6/group             | n=2                     |
| Figure 3e | Mann-Whitney U Test     | N/A              | Two-sided | <.001          | Mean              | SD    | N/A                  | n=2 or 3/group        | n=2                     |
| Figure 3f | Two-way ANOVA           | Sidek            | N/A       | <.05           | Mean              | SEM   | N/A                  | n=3 or 4/group        | n=2                     |
| Figure 3g | Mann-Whitney U Test     | N/A              | Two-sided | <.01           | Mean              | SD    | N/A                  | n=3                   | n=2                     |
| Figure 3h | Mann-Whitney U Test     | N/A              | Two-sided | <.01           | Mean              | SEM   | N/A                  | n=7 or 8/group        | n=2                     |
| Figure 4a | Two-way ANOVA           | Sidek            | N/A       | <.001          | Mean              | SD    | n=2                  | N/A                   | n=3                     |
| Figure 4b | Two-way ANOVA           | Sidek            | N/A       | <.001          | Mean              | SEM   | n=2                  | n=3                   | n=2                     |
| Figure 4c | Two-way ANOVA           | Sidek            | N/A       | <.01 - <.05    | Mean              | SD    | N/A                  | n=2                   | n=2                     |
| Figure 4e | One-way ANOVA           | Tukey            | N/A       | <.001          | Mean              | SD    | N/A                  | n=3 or 4/group        | n=3                     |
| Figure 4f | One-way ANOVA           | Tukey            | N/A       | <.001          | Mean              | SD    | N/A                  | n=3 or 4/group        | n=3                     |
| Figure 4g | Mann-Whitney U Test     | N/A              | Two-sided | <.001          | Mean              | SD    | N/A                  | n=2 or 3/group        | n=2                     |
| Figure 4h | One-way ANOVA           | Tukey            | N/A       | <.001          | Mean              | SD    | N/A                  | n=3 or 4/group        | n=3                     |
| Figure 4i | Two-way ANOVA           | Sidek            | N/A       | <.01 - <.05    | Mean              | SEM   | N/A                  | n=3 or 4/group        | n=3                     |
| Figure 5a | Mann-Whitney U Test     | N/A              | Two-sided | <.001          | Mean              | SEM   | N/A                  | n=3 or 4/group        | n=2                     |
| Figure 5b | One-way ANOVA           | Tukey            | N/A       | <.001          | Mean              | SEM   | N/A                  | n=3 or 4/group        | n=2                     |
| Figure 5c | One-way ANOVA           | Tukey            | N/A       | <.001          | Mean              | SEM   | N/A                  | n=3 or 4/group        | n=2                     |
| Figure 5d | Mann-Whitney U Test     | N/A              | Two-sided | <.001 - <.05   | Mean              | SD    | N/A                  | n=3 or 4/group        | n=2                     |
| Figure 5f | One-way ANOVA           | Tukey            | N/A       | <.001 - <.05   | Mean              | SEM   | N/A                  | n=3 or 4/group        | n=2                     |

## Supplementary Table 4. List of Statistical Tests and Sample Sizes Used From Each Figure (Page 2)

### Extended Data

| Figure ID    | Statistical test used   | Post-hoc test    | Direction | p value range  | Measure of Centre | Error | Technical replicates | Biological replicates | Experimental replicates |
|--------------|-------------------------|------------------|-----------|----------------|-------------------|-------|----------------------|-----------------------|-------------------------|
| Ext. Data 1a | N/A                     | N/A              | N/A       | N/A            | N/A               | N/A   | N/A                  | n=1/group             | n=4                     |
| Ext. Data 1b | Principal Component     | N/A              | N/A       | N/A            | N/A               | N/A   | N/A                  | n=1/group             | n=4                     |
| Ext. Data 2a | Differential Expression | Indep. Filtering | Two-sided | adjusted p <.1 | N/A               | N/A   | N/A                  | n=1/group             | n=4                     |
| Ext. Data 3a | Mann-Whitney U Test     | N/A              | Two-sided | <.001 - <.05   | Mean              | SEM   | N/A                  | n=3 or 4/group        | n=2                     |
| Ext. Data 4a | N/A                     | N/A              | N/A       | N/A            | N/A               | N/A   | N/A                  | n=1/group             | n=3                     |
| Ext. Data 4b | N/A                     | N/A              | N/A       | N/A            | Mean              | SEM   | N/A                  | n=3                   | n=1                     |
| Ext. Data 4c | N/A                     | N/A              | N/A       | N/A            | Fold Change       | N/A   | N/A                  | n=1/group             | n=1                     |
| Ext. Data 4d | N/A                     | N/A              | N/A       | N/A            | Fold Change       | N/A   | N/A                  | n=1/group             | n=1                     |
| Ext. Data 5a | Mann-Whitney U Test     | N/A              | Two-sided | <.001          | Mean              | SD    | N/A                  | n=2 or 3/group        | n=2                     |
| Ext. Data 5b | N/A                     | N/A              | N/A       | N/A            | Fold Change       | N/A   | N/A                  | n=1/group             | n=1                     |
| Ext. Data 5c | Mann-Whitney U Test     | N/A              | Two-sided | <.001          | Mean              | SEM   | N/A                  | n=2/group             | n=2                     |
| Ext. Data 5d | N/A                     | N/A              | N/A       | N/A            | Fold Change       | N/A   | N/A                  | n=1/group             | n=1                     |
| Ext. Data 5e | Mann-Whitney U Test     | N/A              | Two-sided | <.001          | Mean              | SD    | N/A                  | n=2 or 3/group        | n=2                     |
| Ext. Data 5f | Mann-Whitney U Test     | N/A              | Two-sided | ns             | Mean              | SD    | N/A                  | n=3 or 4/group        | n=2                     |
| Ext. Data 5g | N/A                     | N/A              | N/A       | N/A            | N/A               | N/A   | N/A                  | n=1/group             | n=2                     |
| Ext. Data 6a | Two-way ANOVA           | Sidek            | N/A       | <.001          | Mean              | SD    | N/A                  | n=3 or 4/group        | n=3                     |
| Ext. Data 6b | Two-way ANOVA           | Sidek            | N/A       | <.001          | Mean              | SD    | N/A                  | n=2 or 3/group        | n=2                     |
| Ext. Data 6c | Two-way ANOVA           | Sidek            | N/A       | <.001 - <.01   | Mean              | SD    | N/A                  | n=4/group             | n=1                     |
| Ext. Data 7a | One-way ANOVA           | Tukey            | N/A       | <.001          | Mean              | SEM   | n=2                  | n=1/group             | n=3                     |
| Ext. Data 7b | Mann-Whitney U Test     | N/A              | Two-sided | <.001          | Mean              | SD    | N/A                  | n=3/group             | n=2                     |
| Ext. Data 7c | Mann-Whitney U Test     | N/A              | N/A       | N/A            | N/A               | N/A   | N/A                  | n=1/group             | n=2                     |
| Ext. Data 7d | Two-way ANOVA           | Sidek            | N/A       | <.001          | Mean              | SD    | N/A                  | n=3 or 4/group        | n=3                     |
| Ext. Data 7e | Two-way ANOVA           | Sidek            | N/A       | <.001          | Mean              | SEM   | n=2                  | n=3 or 4/group        | n=3                     |
| Ext. Data 8a | One-way ANOVA           | Tukey            | N/A       | <.01           | Mean              | SEM   | N/A                  | n=3 or 4/group        | n=2                     |
| Ext. Data 8b | One-way ANOVA           | Tukey            | N/A       | <.001          | Mean              | SEM   | N/A                  | n=3 or 4/group        | n=2                     |
| Ext. Data 8c | Mann-Whitney U Test     | N/A              | Two-sided | <.001          | Mean              | SD    | N/A                  | n=3/group             | n=2                     |
| Ext. Data 8d | Mann-Whitney U Test     | N/A              | Two-sided | <.001          | Mean              | SD    | N/A                  | n=6/group             | n=2                     |
| Ext. Data 8e | One-way ANOVA           | Tukey            | N/A       | <.001 - <.05   | Mean              | SEM   | N/A                  | n=2 or 3/group        | n=2                     |
| Ext. Data 8f | N/A                     | N/A              | N/A       | N/A            | N/A               | N/A   | N/A                  | n=2 or 3/group        | n=2                     |
